# Supplementary material for: Thermosensitive liposome-encapsulated gold nanocages for photothermal-modulated drug release and synergistic photothermal therapy
Source: Royal Society of Chemistry journal article supplement (doi:10.1039/d4tb02056a), 2024-12-23
Supplement: d4tb02056a1.pdf [file d4tb02056a1.pdf]

## Supporting Information

### Thermosensitive liposome-encapsulated gold nanocage for photothermal-modulated drug release and synergistic photothermal therapy

Ran Hao<sup>a#</sup>, Meng Jiao<sup>#</sup>, Xingguo Xu<sup>a</sup>, Di Wu<sup>a</sup>, Haiying Wei<sup>a\*</sup>, and Leyong Zeng<sup>a,b\*</sup>

<sup>a</sup>College of Chemistry and Materials Science, Chemical Biology Key Laboratory of Hebei Province, Hebei Research Center of the Basic Discipline of Synthetic Chemistry, Hebei University, Baoding, 071002, P.R. China.

<sup>b</sup>Key Laboratory of Medicinal Chemistry and Molecular Diagnosis of the Ministry of Education, State Key Laboratory of New Pharmaceutical Preparations and Excipients, Baoding, 071002, P.R. China.

<sup>c</sup>Department of Radiotherapy, Affiliated Hospital of Hebei University, Baoding 071000, P. R. China.

<sup>#</sup>These authors contributed equally to this work.

\*Corresponding authors. E-mail address: zengly@hbu.cn (L. Zeng), weihy@hbu.cn (H. Wei)

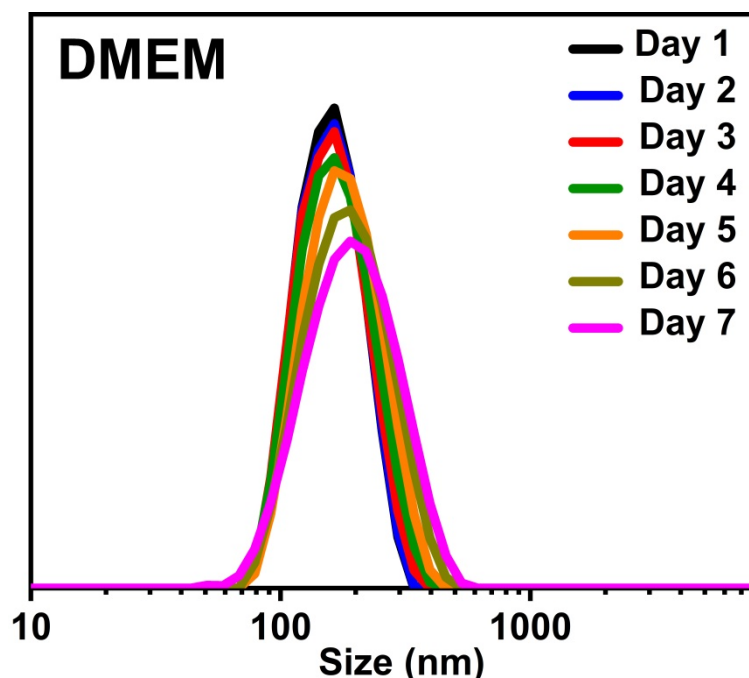

Fig. S1. DLS curves of AuNCs/CPT@TSL dispersed in DMEM medium.

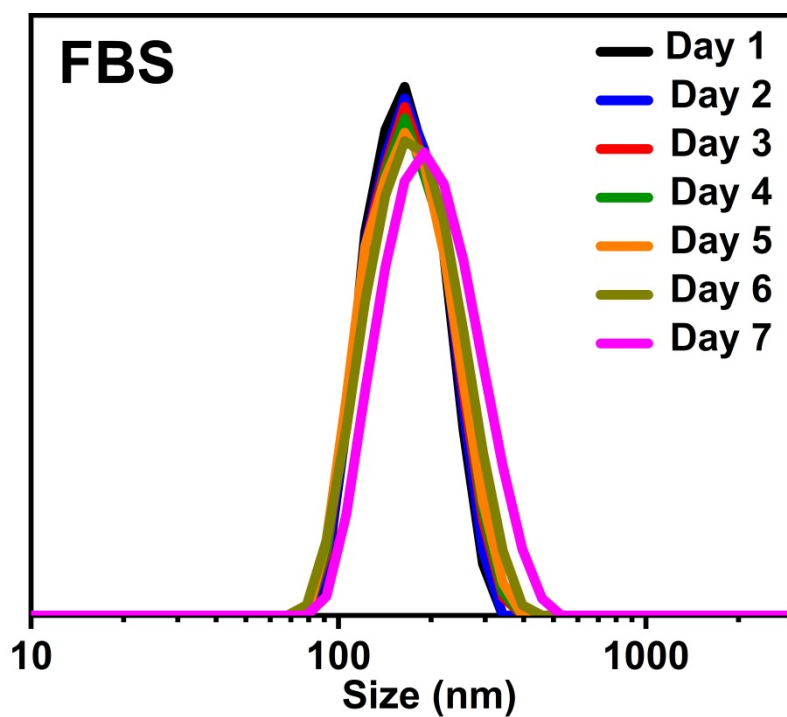

Fig. S2. DLS curves of AuNCs/CPT@TSL dispersed in FBS.

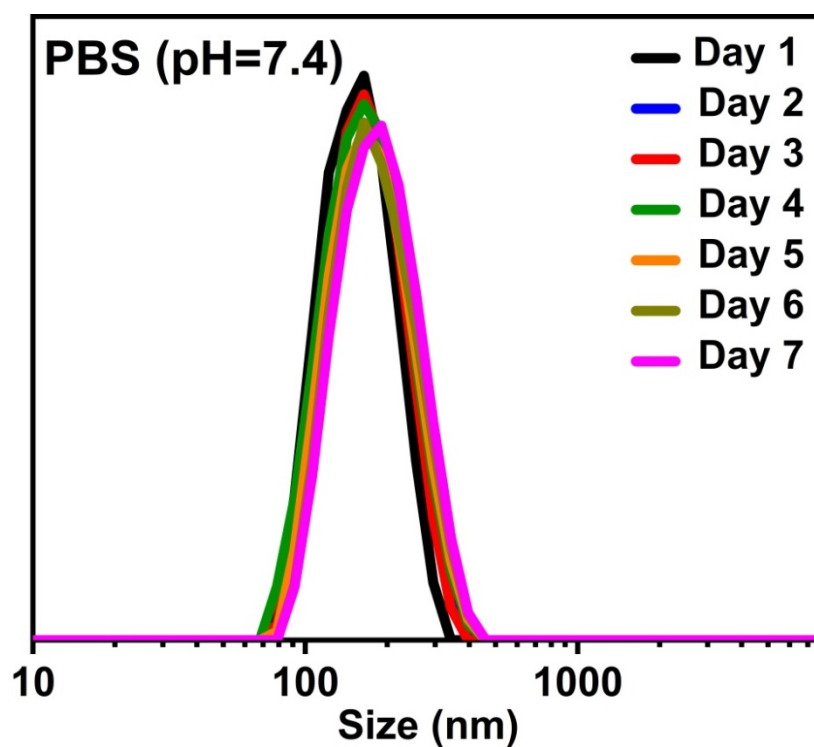

Fig. S3. DLS curves of AuNCs/CPT@TSL dispersed in PBS (pH=7.4).

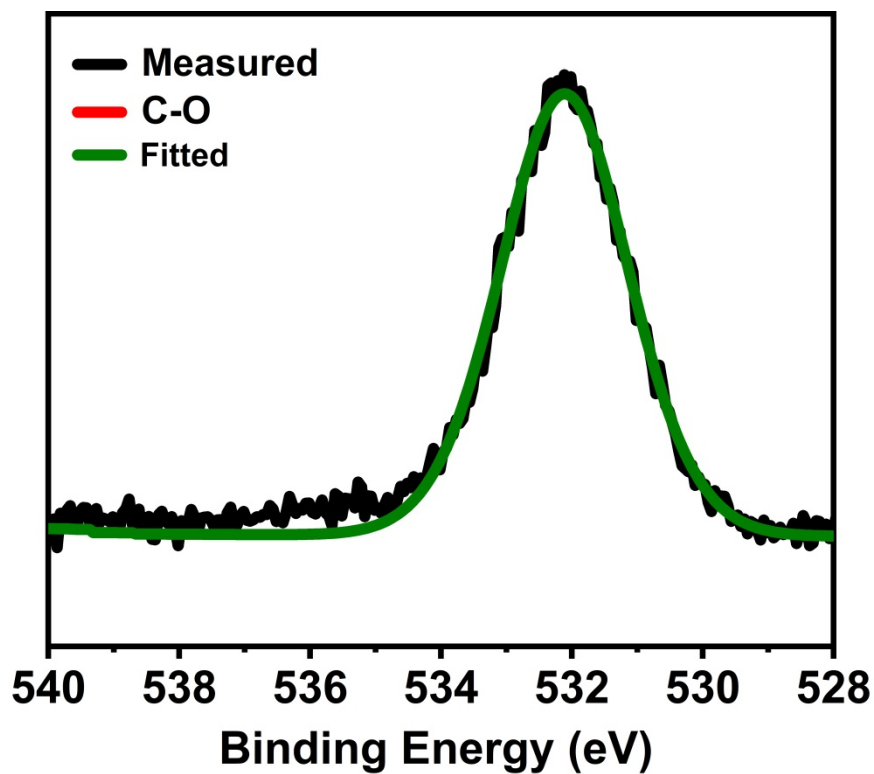

Fig. S4. XPS spectra of AuNCs in the orbit of O1s.

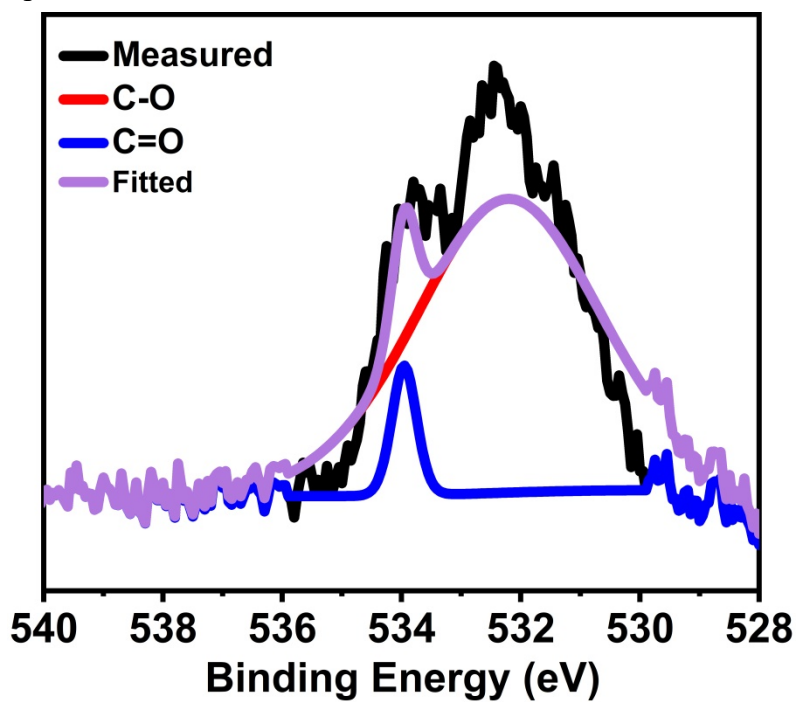

Fig. S5. XPS spectra of AuNCs/CPT in the orbit of O1s.

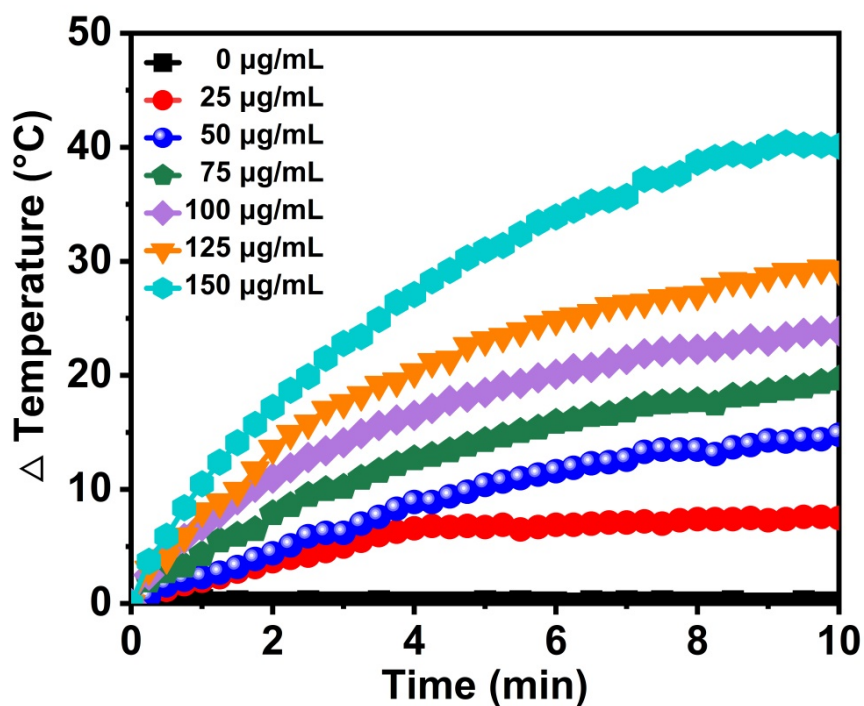

**Fig. S6.** Temperature change curves of AuNCs with different concentrations irradiated by an 808 nm laser ( $1.0 \text{ W/cm}^2$ ).

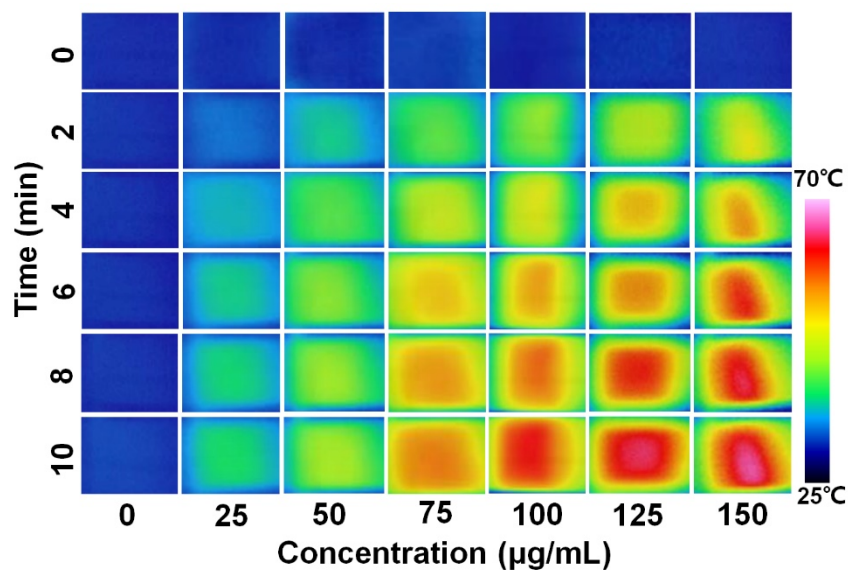

**Fig. S7.** Thermal imaging images of AuNCs with different concentrations irradiated by an 808 nm laser ( $1.0 \text{ W/cm}^2$ ).

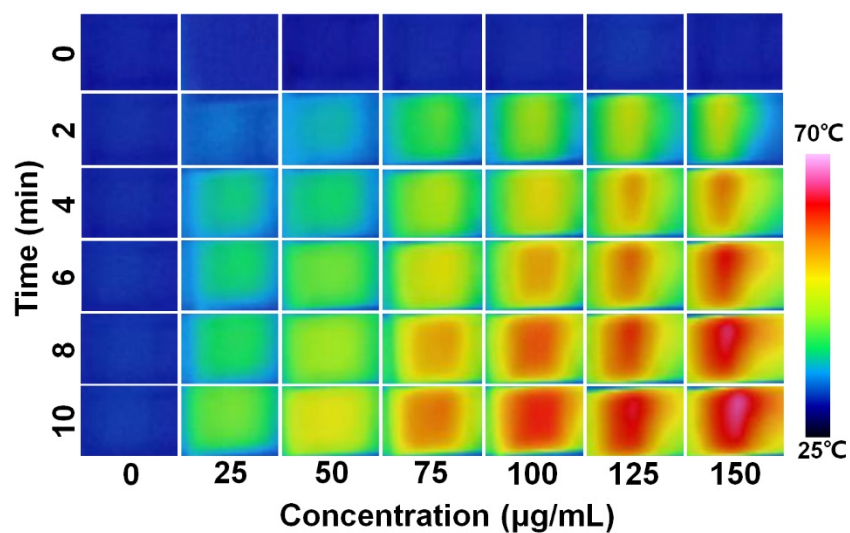

**Fig. S8.** Thermal imaging images of AuNCs/CPT@TSL with different concentrations irradiated by an 808 nm laser ( $1.0 \text{ W/cm}^2$ ).

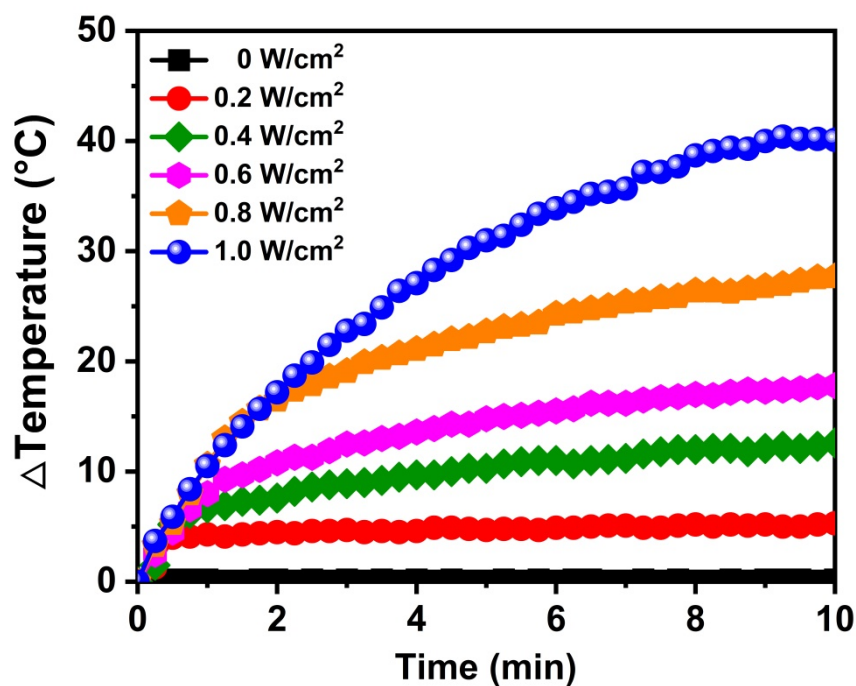

**Fig. S9.** Temperature change curves of AuNCs (150 μg/mL) irradiated by an 808 nm laser with different power densities.

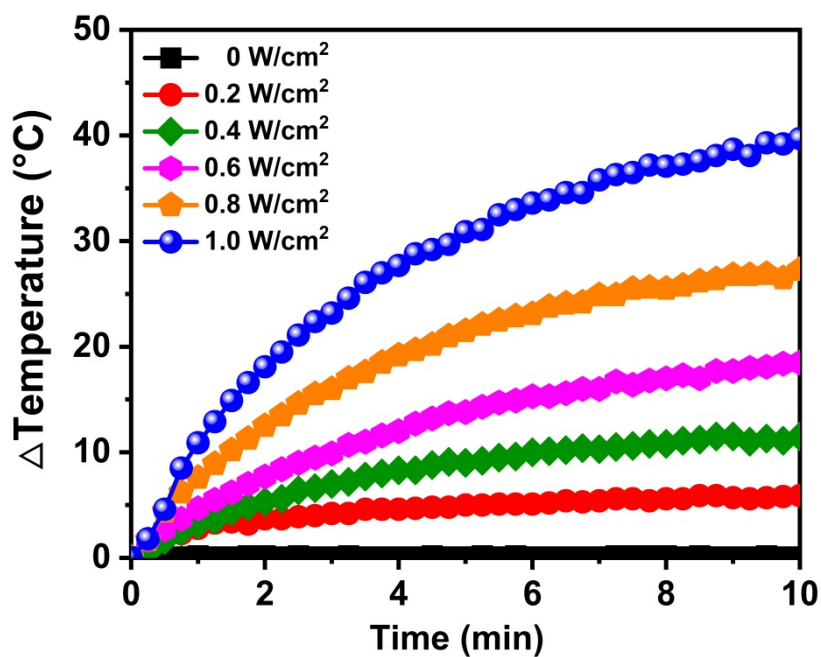

**Fig. S10.** Temperature change curves of AuNCs/CPT@TSL (150  $\mu\text{g/mL}$ ) irradiated by an 808 nm laser with different power densities.

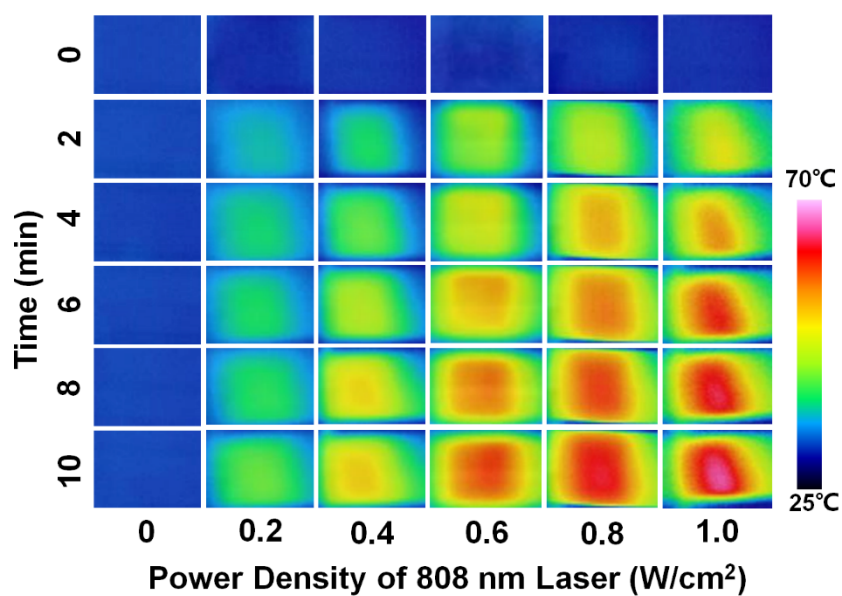

**Fig. S11.** Thermal imaging images of AuNCs (150  $\mu\text{g/mL}$ ) irradiated by an 808 nm laser with different power densities.

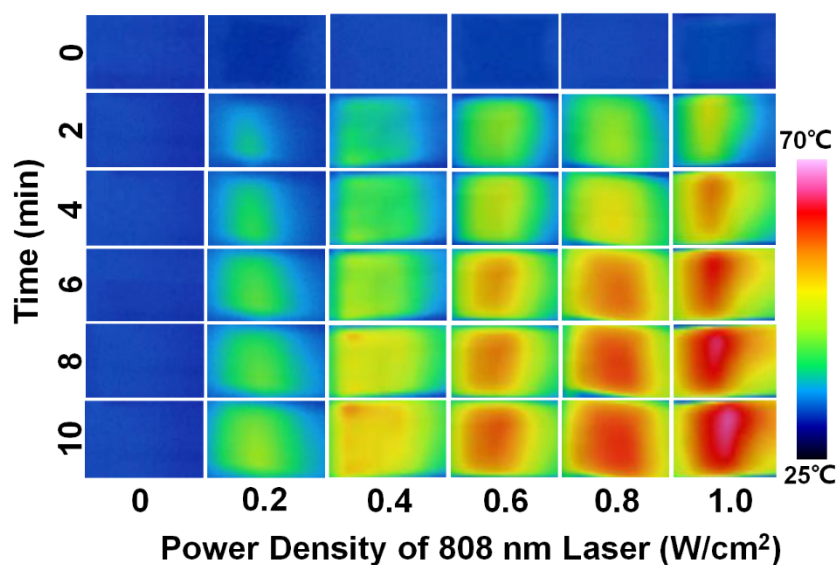

**Fig. S12.** Thermal imaging images of AuNCs/CPT@TSL (150 μg/mL) irradiated by an 808 nm laser with different power densities.

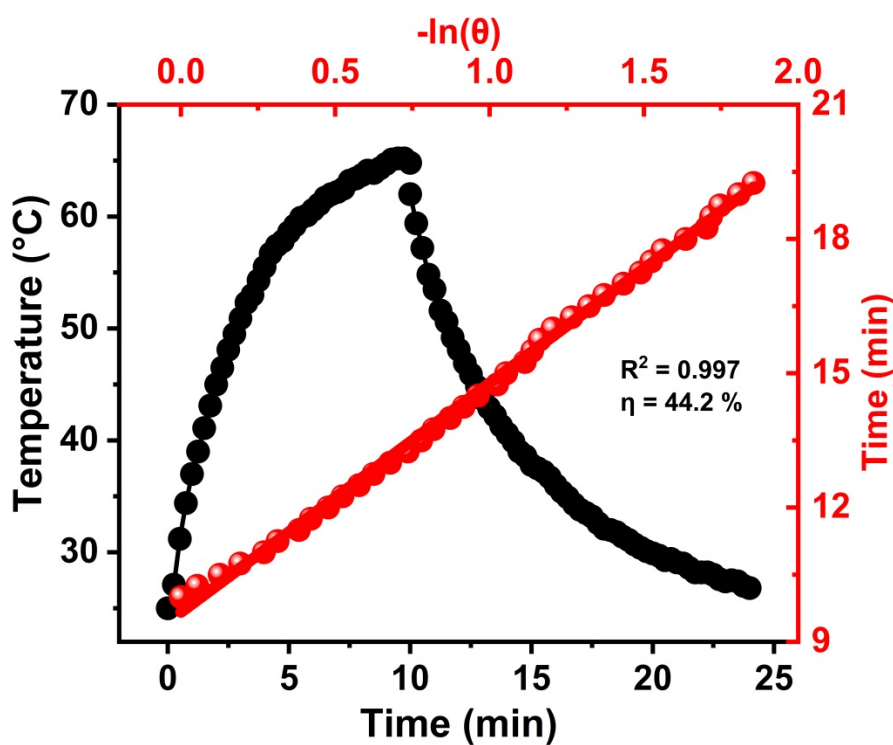

**Fig. S13.** Heating/cooling and fitting curves of AuNCs (150 μg/mL) irradiated by an 808 nm laser (1.0 W/cm²).

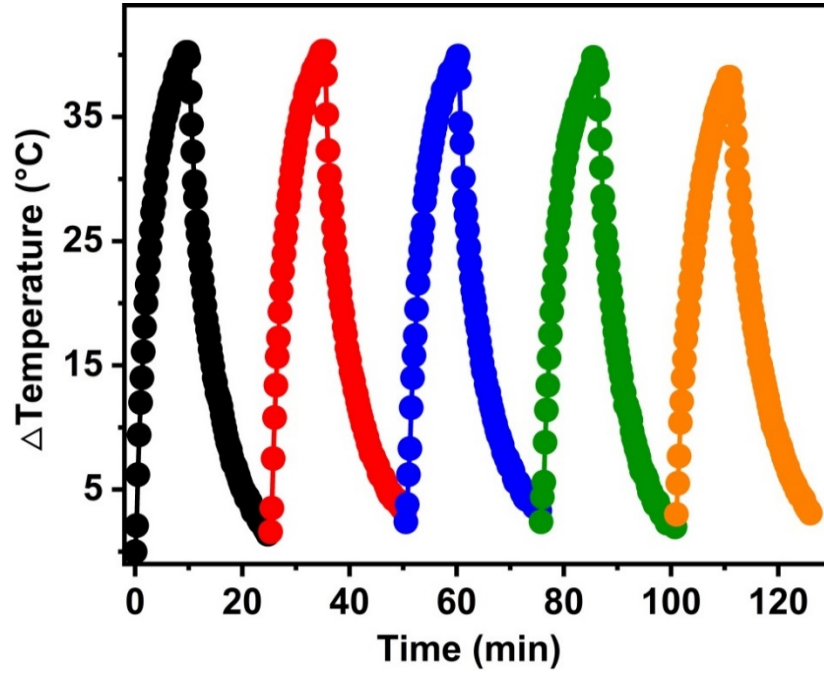

**Fig. S14.** Temperature change curves of AuNCs (150  $\mu\text{g/mL}$ ) irradiated by an 808 nm laser (1.0  $\text{W/cm}^2$ ) by repeating on/off laser.

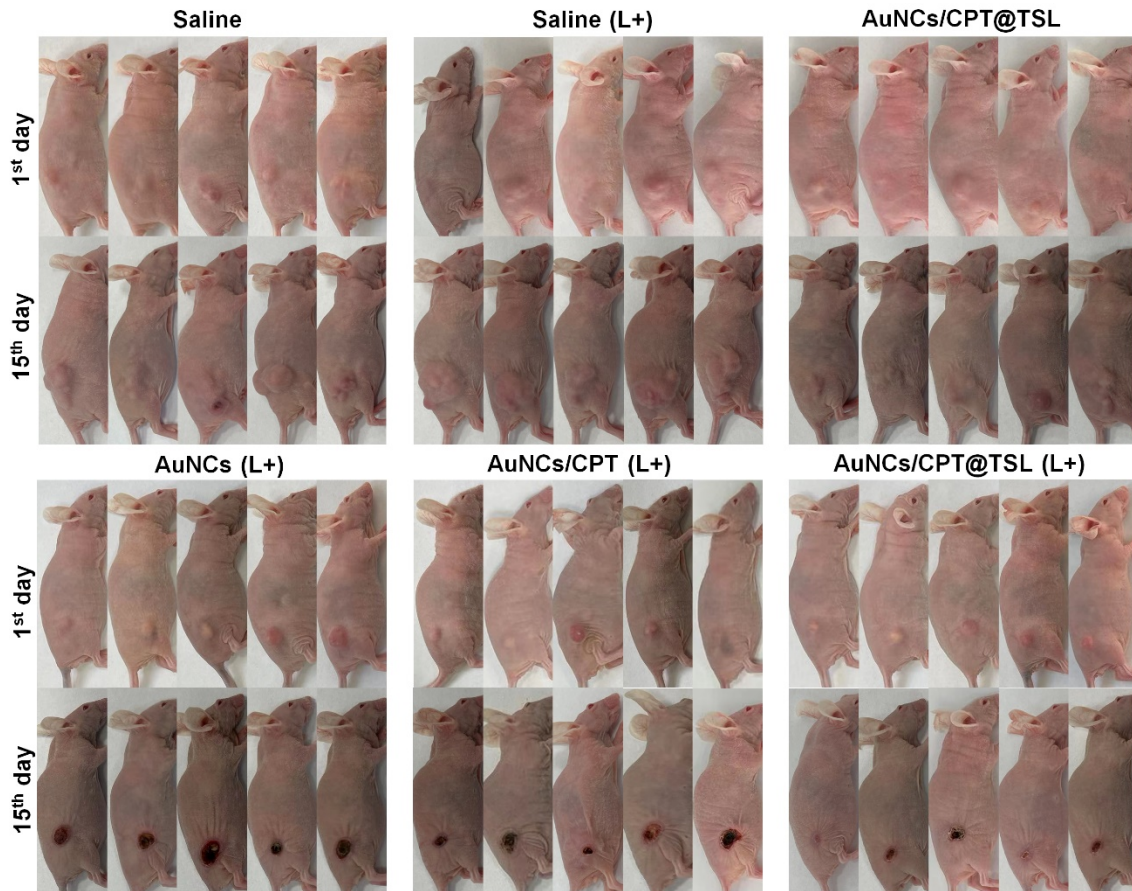

**Fig. S15.** Real photographs of mice in six groups.



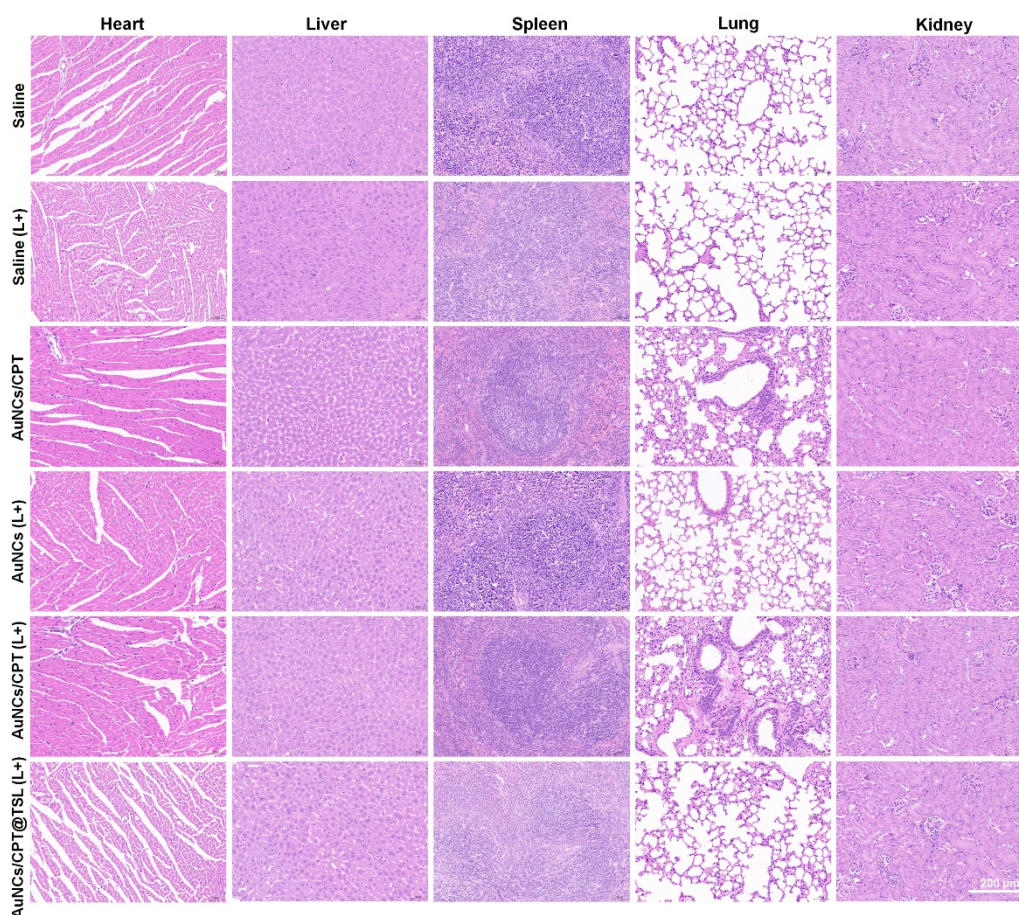

**Fig. S16.** H&E staining images of organs in six groups.

|                           | WBC<br>( $10^9/L$ ) | RBC<br>( $10^{12}/L$ ) | HGB<br>(g/L) | HCT<br>(%)  | PLT<br>( $10^9/L$ ) | ALT<br>(U/L)    | AST<br>(U/L)     | TBIL<br>( $\mu M$ ) | UREA<br>(mM)  | CREA<br>( $\mu M$ ) |
|---------------------------|---------------------|------------------------|--------------|-------------|---------------------|-----------------|------------------|---------------------|---------------|---------------------|
| <b>Reference Range</b>    | 0.8-10.6            | 6.5-11.5               | 110-165      | 35-55       | 400-1600            | 10.1-96.5       | 36.3-235.5       | 6.1-53.1            | 3.9-12.4      | 10.9-85.1           |
| <b>Saline</b>             | 15.8 $\pm$ 1.1      | 8.8 $\pm$ 1.2          | 141 $\pm$ 17 | 41 $\pm$ 8  | 1433 $\pm$ 154      | 38.0 $\pm$ 12.3 | 236.5 $\pm$ 13.5 | 9.7 $\pm$ 10.2      | 9.2 $\pm$ 3.5 | 104.2 $\pm$ 10.5    |
| <b>Saline (L+)</b>        | 22.3 $\pm$ 2.4      | 7.4 $\pm$ 1.0          | 124 $\pm$ 13 | 35 $\pm$ 10 | 1357 $\pm$ 139      | 33.1 $\pm$ 14.6 | 237.2 $\pm$ 18.7 | 10.1 $\pm$ 8.4      | 9.7 $\pm$ 4.2 | 124.7 $\pm$ 9.1     |
| <b>AuNCs/CPT</b>          | 15.1 $\pm$ 1.8      | 8.1 $\pm$ 1.5          | 172 $\pm$ 16 | 48 $\pm$ 16 | 1557 $\pm$ 180      | 51.2 $\pm$ 16.2 | 267.9 $\pm$ 13.5 | 12.6 $\pm$ 9.3      | 9.6 $\pm$ 3.8 | 113.8 $\pm$ 10.7    |
| <b>AuNCs (L+)</b>         | 7.8 $\pm$ 1.9       | 9.1 $\pm$ 1.1          | 134 $\pm$ 13 | 37 $\pm$ 11 | 1224 $\pm$ 132      | 41.1 $\pm$ 12.9 | 122.4 $\pm$ 17.5 | 9.1 $\pm$ 12.2      | 7.8 $\pm$ 3.1 | 60.3 $\pm$ 12.1     |
| <b>AuNCs/CPT (L+)</b>     | 12.1 $\pm$ 2.2      | 9.3 $\pm$ 0.8          | 155 $\pm$ 12 | 43 $\pm$ 9  | 1180 $\pm$ 145      | 44.2 $\pm$ 14.1 | 245.1 $\pm$ 16.8 | 11.5 $\pm$ 7.6      | 8.3 $\pm$ 2.8 | 102.9 $\pm$ 13.2    |
| <b>AuNCs/CPT@TSL (L+)</b> | 7.9 $\pm$ 1.5       | 9.6 $\pm$ 0.7          | 146 $\pm$ 11 | 42 $\pm$ 6  | 1029 $\pm$ 162      | 43.5 $\pm$ 16.7 | 144.9 $\pm$ 14.2 | 8.0 $\pm$ 8.1       | 7.5 $\pm$ 3.2 | 23.9 $\pm$ 15.3     |

**Fig. S17.** Blood indexes of routine and biochemistry in six groups.
